# Supplementary material for: Contact between water vapor and silicate surface causes abiotic formation of reactive oxygen species in an anoxic atmosphere
Source: PubMed Central journal article supplement — Proc Natl Acad Sci U S A. 2023 Jul 17;120(30):e2302014120. doi: 10.1073/pnas.2302014120 (PMC10372544; doi:10.1073/pnas.2302014120), 2023-07-17
Supplement: pnas.2302014120.sapp.pdf [file pnas.2302014120.sapp.pdf]

## Supplementary Information

# Contact Between Water Vapor and Silicate Surface Causes Abiotic Formation of Reactive Oxygen Species in an Anoxic Atmosphere

Yu Xia,<sup>a,b,c</sup> Juan Li,<sup>b,d</sup> Yuanzheng Zhang,<sup>d</sup> Yongguang Yin,<sup>e</sup> Bolei Chen,<sup>a,b,e,\*</sup> Yong Liang,<sup>a,b,\*</sup> Guibin Jiang<sup>e</sup>, and Richard N. Zare<sup>e,\*</sup>

<sup>a</sup>State Key Laboratory of Precision Blasting, Jiangnan University, Wuhan, 430056, China.

<sup>b</sup>Hubei Key Laboratory of Environmental and Health Effects of Persistent Toxic Substances, Jiangnan University, Wuhan, 430056, China.

<sup>c</sup>Department of Chemistry, Stanford University, Stanford, CA 94305, USA.

<sup>d</sup>School of Physics and Technology, Wuhan University, Wuhan, 430072, China.

<sup>e</sup>State Key Laboratory of Environmental Chemistry and Ecotoxicology, Research Center for Eco-Environmental Sciences, Chinese Academy of Sciences, P. O. Box 2871, Beijing 10085, China.

\*Bolei Chen [https://orcid.org/ 0000-0001-8552-3334](https://orcid.org/0000-0001-8552-3334);

Yong Liang [https://orcid.org/ 0000-0002-3718-0987](https://orcid.org/0000-0002-3718-0987);

Richard N. Zare [https://orcid.org/ 0000-0001-5266-4253](https://orcid.org/0000-0001-5266-4253)

Email: [bl\\_chen@jhun.edu.cn](mailto:bl_chen@jhun.edu.cn); [ly76@263.net](mailto:ly76@263.net); [zare@stanford.edu](mailto:zare@stanford.edu)

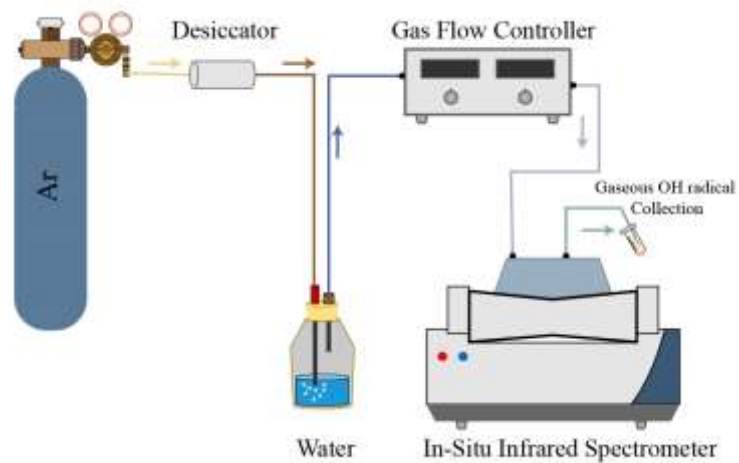

**Figure S1** | The schematic of the experimental setup.

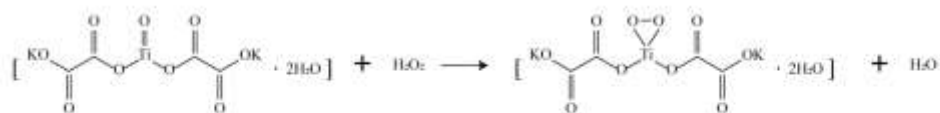

$$\Delta G = -29.9672 \text{ kcal/mol}$$

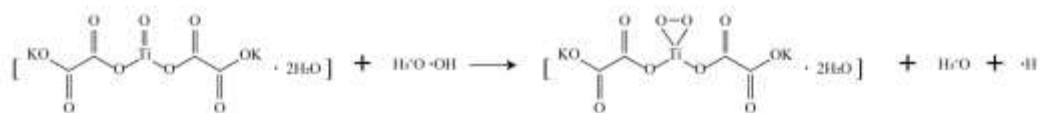

$$\Delta G = -2.4848 \text{ kcal/mol}$$

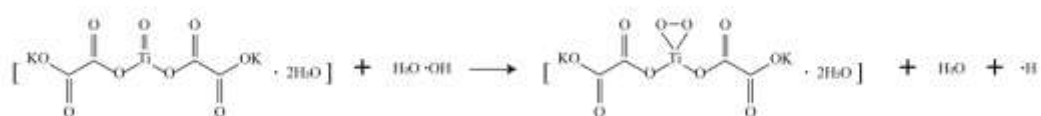

$$\Delta G = -9.1028 \text{ kcal/mol}$$

**Figure S2** | DFT calculation of Gibbs Free Energy ( $\Delta G$ ) about the reaction of  $\text{H}_2\text{O}_2$ ,  $\text{H}_3^+\text{O}\cdot\text{OH}$  and  $\text{H}_2\text{O}\cdot\text{OH}$  with titanium potassium oxalate.

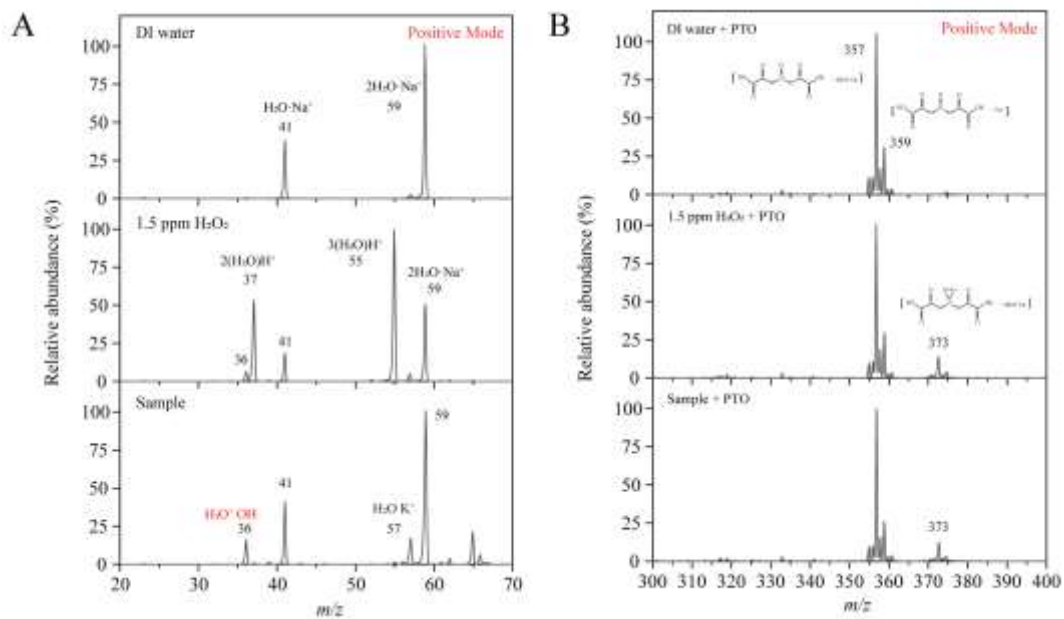

**Figure S3** | (A) Mass spectral results of DI water, 1.5 ppm  $\text{H}_2\text{O}_2$  and sample in positive ion mode, (B) Mass spectral results of DI water, 1.5 ppm  $\text{H}_2\text{O}_2$  and sample reacted with PTO solution in equal volume.

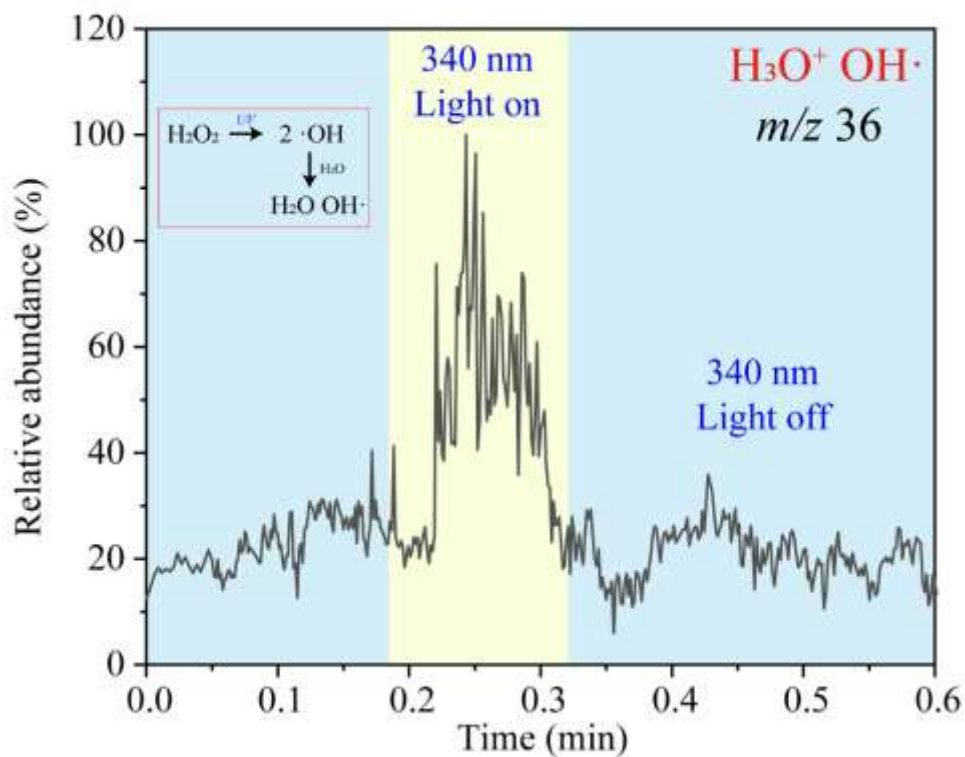

**Figure S4** | Signal intensity at  $m/z$  36 versus time for 1.5 ppm  $\text{H}_2\text{O}_2$  solution. (positive ion mode of mass spectrometry) exposed to 340 nm UV radiation, which is turned off, on, and off.

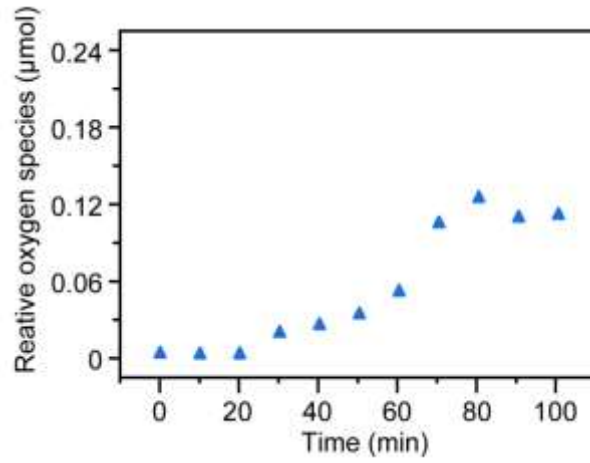

**Figure S5** | The relationship between the amount of reactive oxygen species in the leaving gas and reaction time during the contact process.

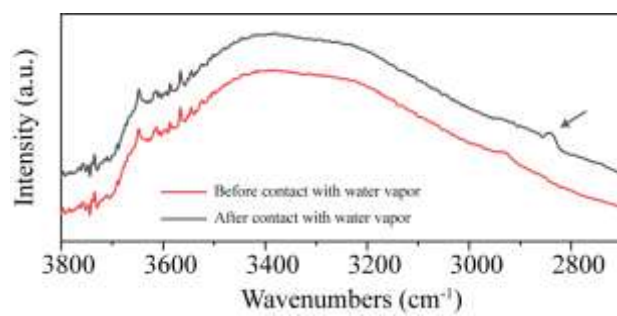

**Figure S6** | The FT-IR spectra of a flat SiO<sub>2</sub> substrate before and after contact with water vapor. The arrow points to the H<sub>2</sub>O<sub>2</sub> absorption feature.

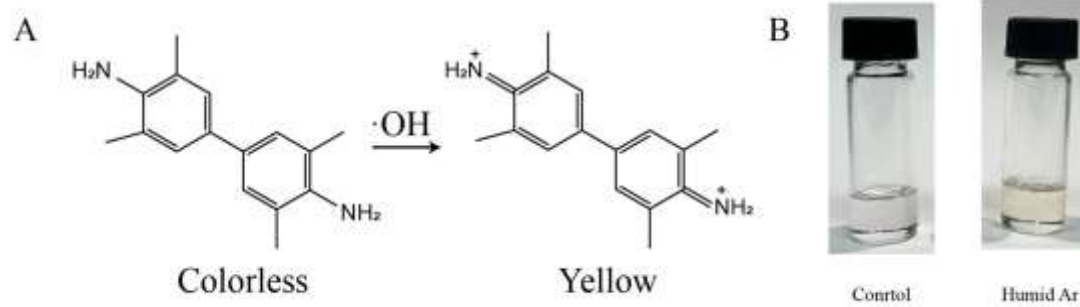

**Figure S7** | (A) The reaction mechanism of TMB oxidization. (B) The digital images of the end-product of TMB oxidized by hydroxyl radicals.



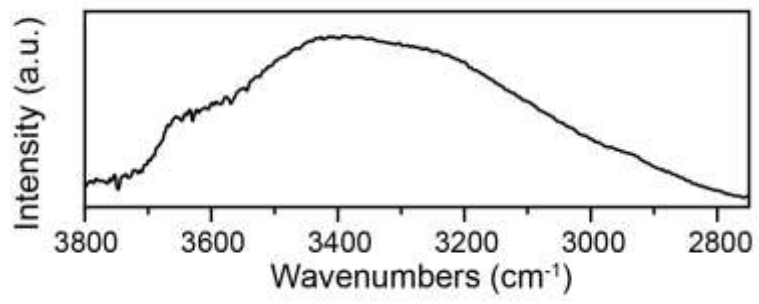

**Figure S8** | A typical FT-IR spectrum of commercial SiO<sub>2</sub> nanoparticles.

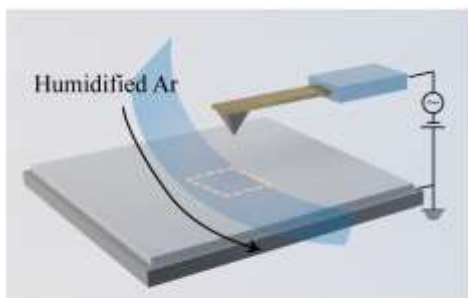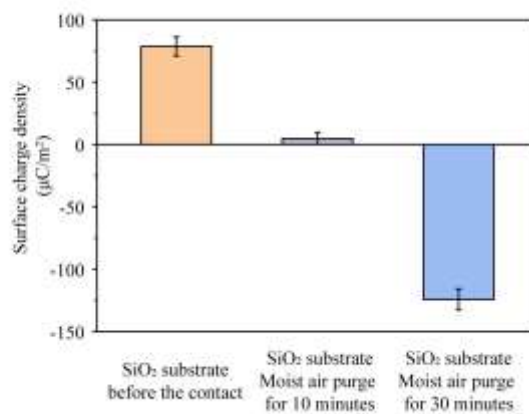

**Figure S9** | The surface charge density of the SiO<sub>2</sub> substrate before and after contact with water vapor.

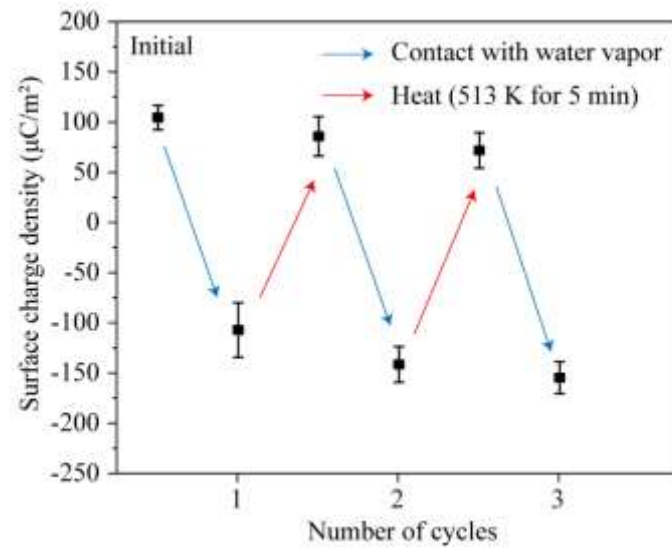

**Figure S10** | The surface charge density of the  $\text{SiO}_2$  substrate following contact with water vapor and then heating, which is repeated three times.
